# Supplementary material
Source: PubMed Central journal article supplement (PMC10448368)

## Supplemental Online Content

Udelson JE, Kelsey MD, Nanna MG, et al; PRECISE Investigators. Deferred testing in stable outpatients with suspected coronary artery disease: a prespecified secondary analysis of the PRECISE randomized clinical trial. *JAMA Cardiol*. Published online August 23, 2023. doi:10.1001/jamacardio.2023.2614

**eTable 1.** Baseline Characteristics in Minimal-Risk vs Elevated-Risk Participants in the PRECISE Trial

**eTable 2.** Medication Use at Each Visit, Stratified by Baseline Use

**eTable 3.** Participants Identified as Minimal Risk by the PROMISE Minimal Risk Score with Significant or Severe Initial Test Findings

**eFigure.** Kaplan–Meier Estimates of the Composite Primary Endpoint as a Function of Time after Randomization

This supplemental material has been provided by the authors to give readers additional information about their work.

**eTable 1. Baseline Characteristics in Minimal-Risk vs Elevated-Risk Participants in the PRECISE Trial**

| Variable                                                            | Minimal-Risk<br>Participants<br>(N = 422) | Elevated-Risk<br>Participants<br>(N = 1681) |
|---------------------------------------------------------------------|-------------------------------------------|---------------------------------------------|
| Age*, mean (SD), y                                                  | 45.6 (8.6)                                | 61.7 (9.8)                                  |
| Sex*                                                                |                                           |                                             |
| Male                                                                | 118/422 (28.0%)                           | 938/1681 (55.8%)                            |
| Female                                                              | 304/422 (72.0%)                           | 743/1681 (44.2%)                            |
| White/Non-Hispanic*                                                 | 313/422 (74.2%)                           | 1454/1681 (86.5%)                           |
| Body mass index, mean (SD), kg/m <sup>2</sup>                       | 30.0 (7.5)                                | 30.0 (6.1)                                  |
| Cardiovascular risk factor history                                  |                                           |                                             |
| Diabetes mellitus*                                                  | 37/422 (8.8%)                             | 336/1681 (20.0%)                            |
| Dyslipidemia*                                                       | 139/422 (32.9%)                           | 1210/1681 (72.0%)                           |
| Family history of premature (age <55 y)*<br>coronary artery disease | 146/422 (34.6%)                           | 653/1681 (38.8%)                            |
| Hypertension*                                                       | 126/422 (29.9%)                           | 1122/1681 (66.7%)                           |
| Current/former smoker*                                              | 147/422 (34.8%)                           | 951/1681 (56.6%)                            |
| Risk scores                                                         |                                           |                                             |
| PROMISE Minimal Risk Score                                          |                                           |                                             |
| Mean (SD)                                                           | 0.633 (0.128)                             | 0.203 (0.123)                               |
| Median (Q1, Q3)                                                     | 0.609 (0.526, 0.721)                      | 0.182 (0.099, 0.296)                        |
| Diamond–Forrester pretest probability score,<br>mean (SD)           | 32.1 (22.6)                               | 61.3 (23.1)                                 |
| Euro 2019 pretest probability score, mean<br>(SD)                   | 7.3 (3.8)                                 | 20.6 (11.5)                                 |
| PCE 10-Year risk score, mean (SD)                                   | 2.44 (2.22)                               | 14.15 (11.58)                               |
| Primary symptom                                                     |                                           |                                             |
| Chest pain/pressure/tightness - substernal or<br>left anterior      | 338/422 (80.1%)                           | 1222/1681 (72.7%)                           |
| Chest pain/pressure/tightness - other location                      | 40/422 (9.5%)                             | 146/1681 (8.7%)                             |
| Arm or shoulder pain                                                | 5/422 (1.2%)                              | 20/1681 (1.2%)                              |
| Back pain                                                           | 1/422 (0.2%)                              | 2/1681 (0.1%)                               |
| Dizziness/lightheaded                                               | 2/422 (0.5%)                              | 8/1681 (0.5%)                               |
| Epigastric pain/abdominal pain                                      | 5/422 (1.2%)                              | 17/1681 (1.0%)                              |
| Palpitations                                                        | 14/422 (3.3%)                             | 28/1681 (1.7%)                              |
| Shortness of breath/dyspnea                                         | 17/422 (4.0%)                             | 195/1681 (11.6%)                            |
| Symptoms related to physical/mental stress *                        |                                           |                                             |
| Yes, occurs with mild exertion/mild stress                          | 75/422 (17.8%)                            | 462/1681 (27.5%)                            |
| Yes, occurs with moderate<br>exertion/moderate stress               | 88/422 (20.9%)                            | 480/1681 (28.6%)                            |

| <b>Variable</b>                                   | <b>Minimal-Risk<br/>Participants<br/>(N = 422)</b> | <b>Elevated-Risk<br/>Participants<br/>(N = 1681)</b> |
|---------------------------------------------------|----------------------------------------------------|------------------------------------------------------|
| Yes, occurs with strenuous exertion/severe stress | 15/422 (3.6%)                                      | 60/1681 (3.6%)                                       |
| No, unrelated to exertion or stress               | 223/422 (52.8%)                                    | 620/1681 (36.9%)                                     |
| Unknown                                           | 21/422 (5.0%)                                      | 59/1681 (3.5%)                                       |
| Site characterization of the primary symptom      |                                                    |                                                      |
| Typical angina                                    | 67/422 (15.9%)                                     | 439/1681 (26.1%)                                     |
| Atypical                                          | 288/422 (68.2%)                                    | 909/1681 (54.1%)                                     |
| Non-cardiac Pain                                  | 8/422 (1.9%)                                       | 13/1681 (0.8%)                                       |
| Dyspnea                                           | 20/422 (4.7%)                                      | 143/1681 (8.5%)                                      |
| Unable to characterize                            | 39/422 (9.2%)                                      | 177/1681 (10.5%)                                     |
| Systolic blood pressure, mean (SD), mmHg          | 126.4 (14.3)                                       | 134.1 (17.5)                                         |
| Diastolic blood pressure, mean (SD), mmHg         | 78.4 (10.4)                                        | 79.8 (10.2)                                          |

Abbreviation: PCE: Pooled Cohort Equations. \*indicates characteristics included in the PROMISE Minimal Risk Score.

Data shown are n/N (%) except where indicated

**eTable 2: Medication Use at Each Visit, Stratified by Baseline Use**

| <b>Variable</b>                            | <b>Minimal-Risk<br/>Deferred Testing<br/>Arm<br/>(N = 214)</b> | <b>Minimal-Risk<br/>Usual Testing Arm<br/>(N = 208)</b> | <b>CMH<br/>P-<br/>Value</b> |
|--------------------------------------------|----------------------------------------------------------------|---------------------------------------------------------|-----------------------------|
| Beta blocker usage at baseline             | 30/214 (14.0%)                                                 | 23/208 (11.1%)                                          |                             |
| Beta blocker usage at 45 days              | 30/195 (15.4%)                                                 | 26/188 (13.8%)                                          | 0.63                        |
| Beta blocker usage at 6 months             | 28/164 (17.1%)                                                 | 20/165 (12.1%)                                          | 0.47                        |
| Beta blocker usage at 12 months            | 23/160 (14.4%)                                                 | 18/158 (11.4%)                                          | 0.36                        |
| Calcium channel blocker usage at baseline  | 17/214 (7.9%)                                                  | 9/208 (4.3%)                                            |                             |
| Calcium channel blocker usage at 45 days   | 15/195 (7.7%)                                                  | 10/188 (5.3%)                                           | 0.77                        |
| Calcium channel blocker usage at 6 months  | 11/164 (6.7%)                                                  | 10/165 (6.1%)                                           | 0.92                        |
| Calcium channel blocker usage at 12 months | 11/160 (6.9%)                                                  | 10/158 (6.3%)                                           | 0.77                        |
| Short-acting nitrates usage at baseline    | 11/214 (5.1%)                                                  | 5/208 (2.4%)                                            |                             |
| Short-acting nitrates usage at 45 days     | 10/195 (5.1%)                                                  | 6/188 (3.2%)                                            | 0.69                        |
| Short-acting nitrates usage at 6 months    | 7/164 (4.3%)                                                   | 3/165 (1.8%)                                            | 0.67                        |
| Short-acting nitrates usage at 12 months   | 7/164 (4.3%)                                                   | 3/165 (1.8%)                                            | 0.58                        |
| Long-acting nitrates usage at baseline     | 3/214 (1.4%)                                                   | 2/208 (1.0%)                                            |                             |
| Long-acting nitrates usage at 45 days      | 4/195 (2.1%)                                                   | 4/188 (2.1%)                                            | 0.54                        |
| Long-acting nitrates usage at 6 months     | 0/164 (0.0%)                                                   | 2/165 (1.2%)                                            | 0.22                        |
| Long-acting nitrates usage at months       | 0/160 (0.0%)                                                   | 2/158 (1.3%)                                            | 0.22                        |
| Antiplatelet usage at baseline             | 24/214 (11.2%)                                                 | 23/208 (11.1%)                                          |                             |
| Antiplatelet usage at 45 days              | 26/195 (13.3%)                                                 | 19/188 (10.1%)                                          | 0.387                       |
| Antiplatelet usage at 6 months             | 20/164 (12.2%)                                                 | 15/165 (9.1%)                                           | 0.191                       |
| Antiplatelet usage at 12 months            | 19/160 (11.9%)                                                 | 10/158 (6.3%)                                           | 0.060                       |
| Lipid-lowering med usage at baseline       | 33/214 (15.4%)                                                 | 23/208 (11.1%)                                          |                             |
| Lipid-lowering med usage at 45 days        | 33/195 (16.9%)                                                 | 24/188 (12.8%)                                          | 0.601                       |
| Lipid-lowering med usage at 6 months       | 27/164 (16.5%)                                                 | 15/165 (9.1%)                                           | 0.105                       |
| Lipid-lowering med usage at 12 months      | 26/160 (16.3%)                                                 | 17/158 (10.8%)                                          | 0.558                       |
| Anti-hypertensive usage at baseline        | 73/214 (34.1%)                                                 | 55/208 (26.4%)                                          |                             |
| Anti-hypertensive usage at 45 days         | 64/195 (32.8%)                                                 | 52/188 (27.7%)                                          | 0.784                       |
| Anti-hypertensive usage at 6 months        | 51/164 (31.1%)                                                 | 44/165 (26.7%)                                          | 0.715                       |
| Anti-hypertensive usage at 12 months       | 48/160 (30.0%)                                                 | 43/158 (27.2%)                                          | 0.527                       |

Abbreviation: CMH: Cochran–Mantel–Haenszel.

**eTable 3: Participants Identified as Minimal Risk by the PROMISE Minimal Risk Score with Significant or Severe Initial Test Findings**

| <b>Randomization Arm</b>                                    | <b>Test Results</b>        | <b>Clinical History</b>                                                                                                                                                                     |
|-------------------------------------------------------------|----------------------------|---------------------------------------------------------------------------------------------------------------------------------------------------------------------------------------------|
| Positive Initial Test Followed by ICA and Revascularization |                            |                                                                                                                                                                                             |
| Deferred Testing                                            | CCTA<br>ICA                | 39yoF HTN, HLD presented with CP. CCTA with multi-vessel disease (severe RCA, moderate prox LAD, significant mid LAD, mild in LCX). ICA with 3VD.<br>Referred for CABG                      |
| Usual Testing                                               | Nuclear Stress<br>ICA      | 55yoF HLD, presented with CP found to have large reversible defect in LAD distribution. ICA with severe stenosis in proximal LAD and LCX.<br>Referred for PCI to both vessels.              |
| Positive Initial Test Without Follow-up Testing             |                            |                                                                                                                                                                                             |
| Deferred Testing                                            | CCTA                       | 49yoF HTN, HLD presented with CP. CCTA with CAC 207, mild stenosis in RCA and LAD, with positive FFR <sub>CT</sub> in a diagonal, LAD distal and RCA branch vessels.<br>No further testing. |
| Usual Testing                                               | Nuclear Stress             | 49yoF presented with CP, ischemia in apical lateral wall.<br>No further testing.                                                                                                            |
| Usual Testing                                               | Stress TTE                 | 42yoF HTN, presented with CP found to have resting EF 40% on TTE and walls did not augment.<br>No further testing.                                                                          |
| <b>“False Positive” Initial Test</b>                        |                            |                                                                                                                                                                                             |
| Usual Testing                                               | Nuclear<br>ICA             | 53yoF, nuclear stress with anterior ischemia.<br>ICA normal coronaries                                                                                                                      |
| Usual Testing                                               | Exercise ECG<br>Stress TTE | 53yoF HTN, HLD presented with dyspnea, stress ECG w/hypertensive response to exercise and positive ST changes.<br>Stress echo normal.                                                       |
| Usual Testing                                               | Nuclear<br>ICA             | 28yoM presented with CP, nuclear stress with inferior/posterior ischemia.<br>ICA normal coronaries                                                                                          |
| Usual Testing                                               | Stress MRI<br>CCTA         | 51yoF HLD, HTN, presented with CP, MRI anterior stress perfusion defect.                                                                                                                    |

|               |                        |                                                                                                                                                    |
|---------------|------------------------|----------------------------------------------------------------------------------------------------------------------------------------------------|
|               |                        | CCTA < 25% stenosis in RCA, otherwise normal coronaries                                                                                            |
| Usual Testing | Stress Echo<br>CCTA    | 46yoF presented with CP, stress TTE with septal/anterior/apical ischemia.<br>CCTA normal coronaries                                                |
| Usual Testing | Exercise ECG<br>ICA    | 55yoF h/o presented with dyspnea, stress ECG positive.<br>ICA with < 50% in LAD otherwise normal                                                   |
| Usual Testing | Nuclear Stress<br>CCTA | 40yoM presented with CP, nuclear w/ischemia in septal/anterior/apical walls.<br>CCTA normal coronaries                                             |
| Usual Testing | Nuclear Stress<br>ICA  | 55yoF HLD, HTN, presented with CP, nuclear with septal/anterior/apical ischemia.<br>ICA normal coronaries.                                         |
| Usual Testing | Nuclear Stress<br>ICA  | 50yoF evaluated with nuclear stress which showed artifact vs inferior ischemia, ICA with normal coronaries and normal coronary flow reserve in RCA |

Abbreviations: CABG: coronary artery bypass grafting; CAC: coronary artery calcium score; CCTA: coronary computed tomographic angiography; CP: chest pain; ECG: electrocardiogram; FFR: fractional flow reserve; HLD: hyperlipidemia; HTN: hypertension; ICA: invasive coronary angiography; LAD: left anterior descending; LCX: left circumflex; MRI: magnetic resonance imaging; PCI: percutaneous coronary intervention; RCA: right coronary artery; TTE: transthoracic echocardiography; 3VD: 3-vessel disease.

False positive defined as initial testing showing significant or severe abnormal findings with subsequent test showing normal or only mildly abnormal findings.

**eFigure 1: Kaplan–Meier Estimates of the Composite Primary Endpoint as a Function of Time after Randomization**

Shown are unadjusted Kaplan–Meier estimates of the primary composite endpoint (death from any cause, nonfatal MI, invasive catheterization without significant CAD). In an unadjusted Cox model of time to the composite primary endpoint, the HR (95% CI) for the precision arm deferred testing group compared to the usual testing group was 0.15 (0.03, 0.66),  $p=0.012$ .

The inset shows the same data on an enlarged y-axis.

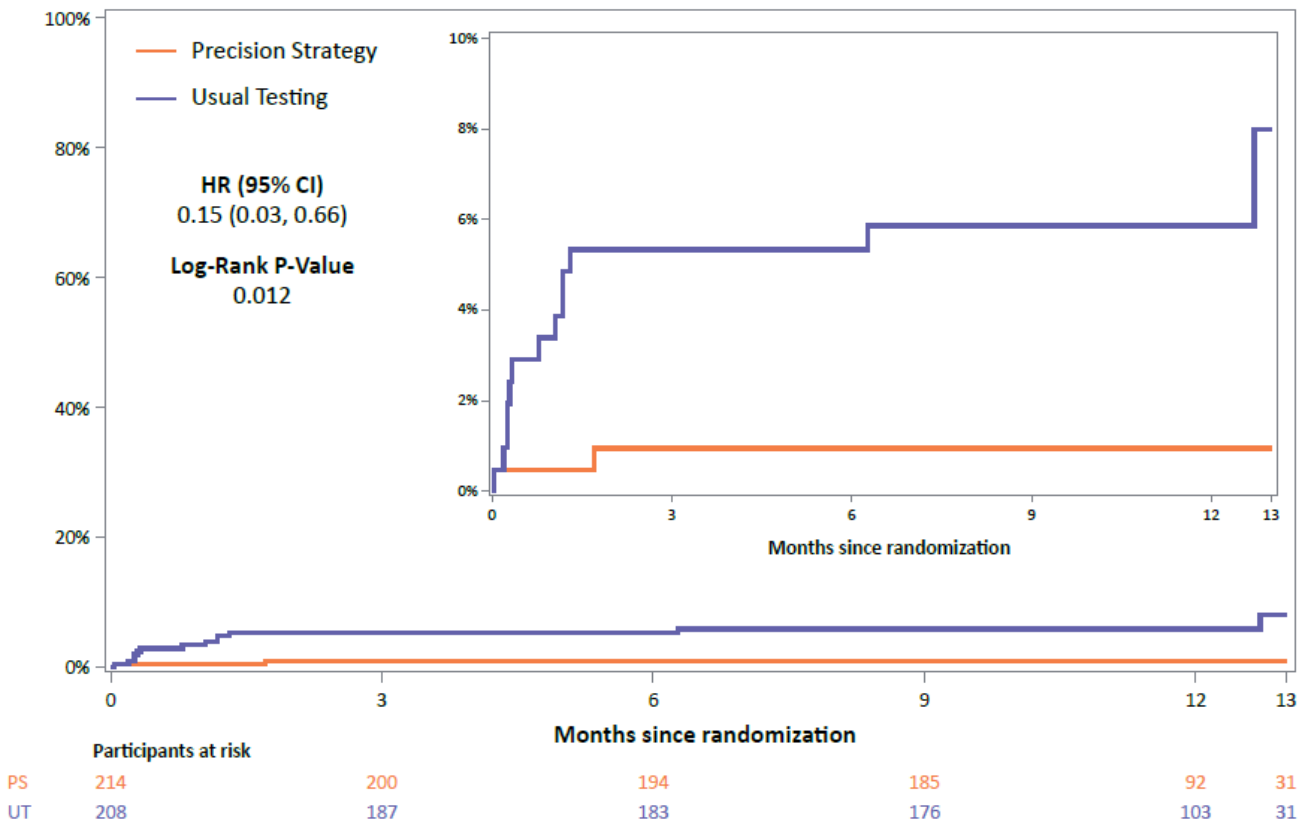

Supplement: jamacardiol-e232614-s001.pdf [file jamacardiol-e232614-s001.pdf]
