# Supplementary material
Source: PubMed Central journal article supplement (PMC10448368)
Supplement: jamacardiol-e232614-s002.pdf [file jamacardiol-e232614-s002.pdf]

## Supplemental Online Content: Nonauthor Collaborators

\*Indicates required information. Only first name, last name, and suffix will appear in PubMed.

| <b>*Group Name(s): PRECISE</b>           |                   |                              |                  |             |                                          |                                                         |                                                                                            |
|------------------------------------------|-------------------|------------------------------|------------------|-------------|------------------------------------------|---------------------------------------------------------|--------------------------------------------------------------------------------------------|
| <b>*First Name and Middle Initial(s)</b> | <b>*Last Name</b> | <b>*Suffix (eg, Jr, III)</b> | Academic Degrees | Institution | Location (city, state/province, country) | Role or Contribution, eg, chair, principal investigator | Group (if more than 1 Group listed in the byline) and/or Subgroup (eg, Steering Committee) |
| Michael                                  | Barry             |                              | MD               |             |                                          | Site PI                                                 |                                                                                            |
| Stephen                                  | Bloom             |                              | MD               |             |                                          | Site PI                                                 |                                                                                            |
| David                                    | Buck              |                              | MD               |             |                                          | Site PI                                                 |                                                                                            |
| Jane                                     | Cao               |                              | MD               |             |                                          | Site PI                                                 |                                                                                            |
| Jeffrey                                  | Carstens          |                              | MD               |             |                                          | Site PI                                                 |                                                                                            |
| Justin                                   | Carter            |                              | MD               |             |                                          | Site PI                                                 |                                                                                            |
| Benjamin                                 | Chow              |                              | MD               |             |                                          | Site PI                                                 |                                                                                            |
| George                                   | Chrysant          |                              | MD               |             |                                          | Site PI                                                 |                                                                                            |
| Jason                                    | Cole              |                              | MD               |             |                                          | Site PI                                                 |                                                                                            |
| Derek                                    | Connolly          |                              | MD               |             |                                          | Site PI                                                 |                                                                                            |
| Ryan                                     | Daly              |                              | MD               |             |                                          | Site PI                                                 |                                                                                            |
| Sorin                                    | Danciu            |                              | MD               |             |                                          | Site PI                                                 |                                                                                            |
| Melissa                                  | Daubert           |                              | MD               |             |                                          | Site PI                                                 |                                                                                            |
| Roderick                                 | Deano             |                              | MD               |             |                                          | Site PI                                                 |                                                                                            |
| Peter                                    | Fail              |                              | MD               |             |                                          | Site PI                                                 |                                                                                            |
| Timothy                                  | Fairbairn         |                              | MD               |             |                                          | Site PI                                                 |                                                                                            |
| Maros                                    | Ferencik          |                              | MD               |             |                                          | Site PI                                                 |                                                                                            |
| Thomas                                   | Hauser            |                              | MD               |             |                                          | Site PI                                                 |                                                                                            |
| Peter                                    | Haworth           |                              | MD               |             |                                          | Site PI                                                 |                                                                                            |
| Mohammad                                 | Hojjati           |                              | MD               |             |                                          | Site PI                                                 |                                                                                            |
| Angela                                   | Hoye              |                              | MD               |             |                                          | Site PI                                                 |                                                                                            |
| Mark                                     | Ibrahim           |                              | MD               |             |                                          | Site PI                                                 |                                                                                            |
| Fuad                                     | Jan               |                              | MD               |             |                                          | Site PI                                                 |                                                                                            |
| Clemens                                  | Kadalie           |                              | MD               |             |                                          | Site PI                                                 |                                                                                            |
| Dinesh                                   | Kalra             |                              | MD               |             |                                          | Site PI                                                 |                                                                                            |
| Ronald                                   | Karlsberg         |                              | MD               |             |                                          | Site PI                                                 |                                                                                            |
| Steven                                   | Kindsvater        |                              | MD               |             |                                          | Site PI                                                 |                                                                                            |
| John                                     | Kobayashi         |                              | MD               |             |                                          | Site PI                                                 |                                                                                            |

Supplemental Online Content: Nonauthor Collaborators

\*Indicates required information. Only first name, last name, and suffix will appear in PubMed.

| *First Name and Middle Initial(s) | *Last Name  | *Suffix (eg, Jr, III) | Academic Degrees | Institution | Location (city, state/province, country) | Role or Contribution, eg, chair, principal investigator | Group (if more than 1 Group listed in the byline) and/or Subgroup (eg, Steering Committee) |
|-----------------------------------|-------------|-----------------------|------------------|-------------|------------------------------------------|---------------------------------------------------------|--------------------------------------------------------------------------------------------|
| David                             | Landers     |                       | MD               |             |                                          | Site PI                                                 |                                                                                            |
| James                             | Lee         |                       | MD               |             |                                          | Site PI                                                 |                                                                                            |
| Diana                             | Litmanovich |                       | MD               |             |                                          | Site PI                                                 |                                                                                            |
| Scott                             | Matson      |                       | MD               |             |                                          | Site PI                                                 |                                                                                            |
| David                             | McAllister  |                       | MD               |             |                                          | Site PI                                                 |                                                                                            |
| Gerald                            | McCann      |                       | MD               |             |                                          | Site PI                                                 |                                                                                            |
| Mark                              | Meier       |                       | MD               |             |                                          | Site PI                                                 |                                                                                            |
| Nicolai                           | Mejevoi     |                       | MD               |             |                                          | Site PI                                                 |                                                                                            |
| Bela                              | Merkely     |                       | MD               |             |                                          | Site PI                                                 |                                                                                            |
| Jamaluddin                        | Moloo       |                       | MD               |             |                                          | Site PI                                                 |                                                                                            |
| Michael                           | Morris      |                       | MD               |             |                                          | Site PI                                                 |                                                                                            |
| Darra                             | Murphy      |                       | MD               |             |                                          | Site PI                                                 |                                                                                            |
| Nasar                             | Nallamothu  |                       | MD               |             |                                          | Site PI                                                 |                                                                                            |
| Anna                              | Narezkina   |                       | MD               |             |                                          | Site PI                                                 |                                                                                            |
| Katarina                          | Nelson      |                       | MD               |             |                                          | Site PI                                                 |                                                                                            |
| Tuan                              | Nguyen      |                       | MD               |             |                                          | Site PI                                                 |                                                                                            |
| Koen                              | Nieman      |                       | MD               |             |                                          | Site PI                                                 |                                                                                            |
| Prabhjot                          | Nijjar      |                       | MD               |             |                                          | Site PI                                                 |                                                                                            |
| Peter                             | O'Kane      |                       | MD               |             |                                          | Site PI                                                 |                                                                                            |
| Amit                              | Patel       |                       | MD               |             |                                          | Site PI                                                 |                                                                                            |
| Hena                              | Patel       |                       | MD               |             |                                          | Site PI                                                 |                                                                                            |
| Thomas                            | Phiambolis  |                       | MD               |             |                                          | Site PI                                                 |                                                                                            |
| Amit                              | Pursnani    |                       | MD               |             |                                          | Site PI                                                 |                                                                                            |
| Mark                              | Rabbat      |                       | MD               |             |                                          | Site PI                                                 |                                                                                            |
| Steven                            | Raible      |                       | MD               |             |                                          | Site PI                                                 |                                                                                            |
| Frederic                          | Resnic      |                       | MD               |             |                                          | Site PI                                                 |                                                                                            |
| Michael                           | Salerno     |                       | MD               |             |                                          | Site PI                                                 |                                                                                            |
| Daniel                            | Sauri       |                       | MD               |             |                                          | Site PI                                                 |                                                                                            |
| Uwe O.P.J.                        | Schoepf     |                       | MD               |             |                                          | Site PI                                                 |                                                                                            |

Supplemental Online Content: Nonauthor Collaborators

\*Indicates required information. Only first name, last name, and suffix will appear in PubMed.

| <b>*First Name and Middle Initial(s)</b> | <b>*Last Name</b> | <b>*Suffix (eg, Jr, III)</b> | Academic Degrees | Institution | Location (city, state/province, country) | Role or Contribution, eg, chair, principal investigator | Group (if more than 1 Group listed in the byline) and/or Subgroup (eg, Steering Committee) |
|------------------------------------------|-------------------|------------------------------|------------------|-------------|------------------------------------------|---------------------------------------------------------|--------------------------------------------------------------------------------------------|
| Moneal                                   | Shah              |                              | MD               |             |                                          | Site PI                                                 |                                                                                            |
| Vincent                                  | Sorrell           |                              | MD               |             |                                          | Site PI                                                 |                                                                                            |
| Michael                                  | Turner            |                              | MD               |             |                                          | Site PI                                                 |                                                                                            |
| Michael                                  | Walls             |                              | MD               |             |                                          | Site PI                                                 |                                                                                            |
| Jonathan                                 | Weir-McCall       |                              | MD               |             |                                          | Site PI                                                 |                                                                                            |
| Frederick                                | Welt              |                              | MD               |             |                                          | Site PI                                                 |                                                                                            |
| Andrew                                   | Zurick            |                              | MD               |             |                                          | Site PI                                                 |                                                                                            |
