# Supplementary material
Source: PubMed Central journal article supplement (PMC10448368)
Supplement: jamacardiol-e232614-s003.pdf [file jamacardiol-e232614-s003.pdf]

## **Data Sharing Statement**

### **Data**

**Data available:** No

### **Additional Information**

**Explanation for why data not available:** The authors do not plan to make available the data collected for this study, but after publication of this article, the PRECISE publications committee will issue a call for research proposals to interested and qualified investigators. Once a proposal is approved by the publications committee, aggregated data relevant to that proposal will be made available to the requesting researcher(s).
